# Supplementary material for: High level ab initio investigation of the catalytic effect of water on formic acid decomposition and isomerization
Source: Royal Society of Chemistry journal article supplement (doi:10.1039/d0cp03796f), 2020-01-01

### Supplementary Information

“High Level *ab initio* Investigation of the Catalytic Effect of Water on Formic Acid Decomposition and Isomerization”

1. Cartesian Coordinates of each stationary point (Bohr) / harmonic vibrational frequencies in  $\text{cm}^{-1}$   
For structures that are  $C_s$  symmetry,  $A''$  modes are **bold**.
2. NBO Results for Transition States.
3. 200 K Gibbs Free Energy Diagram. Additive Gibbs Free Energy corrections were obtained from harmonic vibrational frequency computations in CFOUR2.0. The PES is the sum of the Gibbs corrections and the CCSDT(Q)/CBS energies.

#### Section 1.

##### Monomers/Products:

###### CO

|   |             |            |             |
|---|-------------|------------|-------------|
| O | -0.00000000 | 0.00000000 | 0.92016058  |
| C | 0.00000000  | 0.00000000 | -1.22649083 |

Frequencies:  
2144

###### CO<sub>2</sub>

|   |             |             |             |
|---|-------------|-------------|-------------|
| O | -0.00000000 | -0.00000000 | 2.20523758  |
| C | -0.00000000 | -0.00000000 | -0.00000000 |
| O | 0.00000000  | 0.00000000  | -2.20523758 |

Frequencies:  
664  
664  
1341  
2373

###### H<sub>2</sub>

|   |             |            |             |
|---|-------------|------------|-------------|
| H | -0.00000000 | 0.00000000 | 0.70201448  |
| H | 0.00000000  | 0.00000000 | -0.70201448 |

Frequencies:  
4401

**H<sub>2</sub>O**

|   |            |             |             |
|---|------------|-------------|-------------|
| O | 0.00000000 | 0.00000000  | 0.12495140  |
| H | 0.00000000 | -1.43366380 | -0.99153466 |
| H | 0.00000000 | 1.43366380  | -0.99153466 |

Frequencies:

1646

3811

3920

**FA-cis**

|   |             |             |             |
|---|-------------|-------------|-------------|
| H | -0.05631403 | 2.83518096  | -0.00000000 |
| O | 2.08042249  | -0.42090329 | -0.00000000 |
| H | 3.40193501  | 0.83571081  | -0.00000000 |
| O | -2.14702001 | -0.38010153 | 0.00000000  |
| C | -0.19221491 | 0.75936559  | -0.00000000 |

Frequencies:

513

**655****1029**

1114

1288

1415

1843

3006

3805

**FA-trans**

|   |             |             |            |
|---|-------------|-------------|------------|
| H | 0.05864415  | 2.84797879  | 0.00000000 |
| O | -2.14916597 | -0.23068232 | 0.00000000 |
| H | -1.93011433 | -2.05066427 | 0.00000000 |
| O | 2.12630969  | -0.40726313 | 0.00000000 |
| C | 0.18764156  | 0.78336079  | 0.00000000 |

Frequencies:

627

**665****1051**

1132

1311

1405

1803

3088  
3742

**Complexes:**

**T1**

|   |               |               |               |
|---|---------------|---------------|---------------|
| H | -4.2611702600 | -0.2470350100 | 0.0215261800  |
| O | -1.0015278500 | -2.1682927800 | -0.0135354700 |
| H | 0.8270078300  | -1.8100956200 | -0.0319083300 |
| O | -1.2258473600 | 2.1095698900  | -0.0082012200 |
| C | -2.2120652400 | 0.0355844900  | 0.0008788200  |
| H | 4.8563689600  | 0.2474248100  | -1.2336638500 |
| O | 3.6381172300  | 0.0510014600  | 0.1002974300  |
| H | 2.5269758400  | 1.5085520600  | -0.0132339400 |

Frequencies:

173  
185  
219  
266  
358  
603  
693  
908  
1070  
1211  
1389  
1458  
1644  
1769  
3087  
3427  
3683  
3882

**T2**

|   |             |             |             |
|---|-------------|-------------|-------------|
| H | -0.08064623 | 2.08848197  | -0.00000000 |
| O | -3.67321995 | 0.84018190  | -0.00000000 |
| H | -4.53972292 | -0.77576277 | 0.00000000  |
| O | -0.28994159 | -1.75893418 | 0.00000000  |
| C | -1.18822221 | 0.34384166  | -0.00000000 |
| O | 4.54178634  | 0.63404925  | -0.00000000 |
| H | 3.38591013  | -0.78238223 | 0.00000000  |
| H | 6.19922174  | -0.10595700 | 0.00000000  |

Frequencies:

**60**  
**78**

79  
171  
352  
**475**  
636  
**676**  
**1068**  
1149  
1325  
1412  
1654  
1781  
3112  
3737  
3741  
3899

**T3**

|   |             |             |             |
|---|-------------|-------------|-------------|
| H | -0.06218989 | 1.96622749  | -0.00000000 |
| O | 0.33780693  | -1.81214972 | -0.00000000 |
| H | 1.71444367  | -3.02165594 | 0.00000000  |
| O | 3.65558029  | 0.88257032  | 0.00000000  |
| C | 1.41177652  | 0.51855906  | 0.00000000  |
| H | -3.69775762 | -0.97087741 | -0.00000000 |
| O | -4.52650453 | 0.65087060  | -0.00000000 |
| H | -6.30331866 | 0.27522267  | -0.00000000 |

Frequencies:

**45**  
**74**  
88  
134  
273  
**317**  
626  
**648**  
**1058**  
1114  
1294  
1411  
1645  
1804  
3116  
3746  
3795  
3911

**C1**

|   |             |             |             |
|---|-------------|-------------|-------------|
| H | -0.78145276 | 2.42672801  | -0.00000006 |
| O | -0.18254495 | -1.39946904 | 0.00000001  |
| H | 1.55364735  | -0.78188333 | 0.00000001  |
| O | -4.02414490 | 0.38120447  | 0.00000001  |
| C | -1.76206602 | 0.58992376  | -0.00000002 |
| O | 4.74985715  | 0.46024078  | -0.00000001 |
| H | 5.79398234  | 0.09363822  | -1.44350312 |
| H | 5.79398224  | 0.09363852  | 1.44350326  |

Frequencies:

69  
87  
109  
191  
250  
278  
680  
856  
1042  
1163  
1384  
1416  
1650  
1829  
2995  
3608  
3806  
3910

**C2**

|   |             |             |             |
|---|-------------|-------------|-------------|
| H | 0.03494843  | 2.02931083  | -0.00000000 |
| O | 3.69580356  | 0.66660928  | -0.00000000 |
| H | 4.03015760  | 2.45977065  | -0.00000000 |
| O | 0.27427950  | -1.79372510 | 0.00000000  |
| C | 1.17592424  | 0.29431119  | -0.00000000 |
| O | -4.50635451 | 0.67384109  | -0.00000000 |
| H | -6.17781679 | -0.03383631 | 0.00000000  |
| H | -3.37780062 | -0.76575911 | 0.00000000  |

Frequencies:

75  
83  
88  
173

363  
**487**  
**534**  
664  
**1049**  
1136  
1296  
1430  
1656  
1821  
3041  
3730  
3803  
3898

**C3**

|   |               |               |              |
|---|---------------|---------------|--------------|
| H | -5.7935348600 | 0.7665493599  | 0.0000000000 |
| O | -4.6192667200 | -0.6186046500 | 0.0000000000 |
| H | -2.9804149500 | 0.1884808200  | 0.0000000000 |
| O | 0.4223797499  | 1.8831154100  | 0.0000000000 |
| C | 2.3753004801  | 0.7234285700  | 0.0000000000 |
| O | 2.4374498600  | -1.8198352600 | 0.0000000000 |
| H | 4.1713736501  | -2.3862179600 | 0.0000000000 |
| H | 4.2438240700  | 1.6308505500  | 0.0000000000 |

Frequencies:

32  
**51**  
**75**  
147  
281  
**493**  
**529**  
663  
**1037**  
1136  
1291  
1417  
1669  
1829  
3028  
3754  
3804  
3892

**C4**

|   |             |             |             |
|---|-------------|-------------|-------------|
| H | 4.38323432  | 1.10152586  | -0.00000000 |
| O | 1.96841802  | -1.95933521 | -0.00000000 |
| H | 3.56868244  | -2.83490470 | -0.00000000 |
| O | 0.67074668  | 2.05381401  | 0.00000000  |
| C | 2.37830291  | 0.56016431  | -0.00000000 |
| O | -4.49128436 | -0.31504823 | 0.00000000  |
| H | -2.92005405 | 0.61501151  | 0.00000000  |
| H | -3.95542495 | -2.05081615 | -0.00000000 |

Frequencies:

27  
37  
121  
143  
255  
474  
522  
663  
1034  
1125  
1290  
1414  
1671  
1831  
3031  
3765  
3803  
3889

**Transition States****Inter**

|   |             |             |             |
|---|-------------|-------------|-------------|
| H | -0.16614516 | 2.84663993  | -0.03428326 |
| C | -0.22468884 | 0.77231950  | -0.02319657 |
| O | 2.14527457  | -0.30137726 | 0.12188302  |
| H | 2.82440743  | -0.55659622 | -1.54962156 |
| O | -2.14419905 | -0.42234010 | -0.00467967 |

Frequencies:

599i  
670  
915  
1090  
1208  
1392  
1806  
3039

3827

**Cis-TS**

|   |             |             |             |
|---|-------------|-------------|-------------|
| H | 0.24957415  | 3.02979821  | 0.00000001  |
| O | 2.17294998  | -0.36557240 | 0.00000000  |
| H | 1.94687418  | 2.11422778  | -0.00000001 |
| O | -2.23820209 | -0.22955634 | -0.00000000 |
| C | -0.09749447 | 0.36122961  | -0.00000000 |

Frequencies:

2264i  
616  
721  
886  
1038  
1321  
1759  
2086  
2089

**Trans-TS**

|   |             |             |             |
|---|-------------|-------------|-------------|
| H | -2.97293106 | -1.34018340 | 1.29723903  |
| O | -2.64222309 | -0.22148459 | -0.11397953 |
| C | 0.70139796  | 0.89378299  | 0.03950093  |
| O | 2.37684005  | -0.48877327 | -0.02142037 |
| H | -1.16667284 | 1.97037019  | 0.38132476  |

Frequencies:

1680i  
315  
337  
577  
740  
1046  
1911  
2614  
3764

**T1-TS**

|   |               |               |               |
|---|---------------|---------------|---------------|
| H | -2.2897195800 | -1.7805179801 | 1.5570974700  |
| O | -0.6610553599 | -2.6520903700 | -0.3070310099 |
| H | 1.0956378100  | -2.1597244200 | -0.0513596600 |
| O | -1.8473214600 | 2.1126201799  | -0.3425455901 |



|   |               |              |               |
|---|---------------|--------------|---------------|
| C | -2.3560923899 | 0.1981956101 | 0.5886182800  |
| H | 5.5341480000  | 0.3760734600 | -0.3685536500 |
| O | 3.8098362099  | 0.5042783701 | 0.1922890801  |
| H | 3.0584172100  | 1.7628075800 | -0.8882762700 |

Frequencies:

1749i  
63  
92  
152  
163  
198  
250  
358  
572  
708  
871  
1068  
1643  
1867  
2562  
3665  
3797  
3907

### T2-TS

|   |             |             |             |
|---|-------------|-------------|-------------|
| H | 6.24947892  | 1.73219204  | -0.02433980 |
| O | 4.64706904  | 0.87638792  | -0.08255629 |
| H | 5.07295335  | -0.88890236 | 0.01568524  |
| O | -0.25839906 | -2.15526007 | -0.08749649 |
| C | -0.78563627 | -0.10087811 | 0.37461523  |
| H | -1.57430801 | 1.92113121  | 0.45948604  |
| O | -4.12148736 | 1.11887838  | -0.02735329 |
| H | -4.63406988 | 0.97593475  | -1.77833343 |

Frequencies:

1644i  
32i  
47  
95  
119  
136  
142  
312  
335  
556  
722

1044  
1646  
1920  
2648  
3768  
3805  
3914

**T3-TSa**

|   |             |             |             |
|---|-------------|-------------|-------------|
| C | 1.24650718  | -0.77961143 | -0.09089814 |
| O | 3.41982783  | -0.65566808 | 0.06091185  |
| O | -0.46140764 | 2.22892201  | -0.09756258 |
| H | -1.13454566 | -1.68121725 | -0.10965829 |
| O | -3.40739697 | -1.05090608 | -0.06806220 |
| H | -2.47835153 | 0.88400354  | 0.14596715  |
| H | -4.21930974 | -1.55124686 | 1.48284003  |
| H | 0.11584688  | 3.34112082  | 1.22503001  |

Frequencies:

1702i  
203  
293  
379  
501  
535  
597  
641  
665  
764  
1110  
1360  
1503  
1641  
1974  
2053  
3825  
3841

**T3-TSb**

|   |               |               |               |
|---|---------------|---------------|---------------|
| H | -0.3635076200 | -0.5216239500 | 0.4539301600  |
| O | -0.3306174500 | 2.2295083900  | -0.1110815200 |
| H | 0.1774106600  | 3.3573224900  | 1.2350401500  |
| O | 3.9046181000  | -0.7311457900 | -0.0682397000 |
| C | 1.7534034900  | -0.8362851400 | 0.1014930400  |
| H | -3.6792357300 | 0.6926197900  | -0.2132388300 |
| O | -4.3094266000 | -1.0042132100 | 0.0948654100  |
| H | -5.3403986000 | -1.4133239600 | -1.3438166200 |

Frequencies:

1556i  
75  
87  
201  
214  
274  
320  
369  
567  
623  
698  
1058  
1641  
1952  
2627  
3665  
3782  
3883

**C1-TS**

|   |               |               |               |
|---|---------------|---------------|---------------|
| H | 0.1243125001  | 2.2659889299  | 0.0468542001  |
| O | -0.0071217501 | -1.7932995600 | 0.0063173099  |
| H | 2.7545923300  | -0.8809597801 | -0.0448151300 |
| O | -3.5057677200 | 0.8054247000  | 0.0012353600  |
| C | -1.3670720700 | 0.1004771800  | 0.0097048101  |
| O | 3.9302141601  | 0.6562718701  | -0.1097438700 |
| H | 1.9853864099  | 1.9211518300  | 0.0053361899  |
| H | 4.7899559200  | 0.7602345401  | 1.4989196300  |

Frequencies:

1514i  
169  
372  
459  
488  
598  
786  
844  
896  
1265  
1360  
1397  
1611  
1658  
1890  
1998  
2873  
3807

**C2-TS**

|   |               |               |               |
|---|---------------|---------------|---------------|
| H | -6.2568252400 | -0.4229615501 | 0.0474993300  |
| O | -4.4660054900 | -0.7179905200 | -0.0236722101 |
| H | -3.7108853701 | 0.9400910499  | -0.0361174399 |
| O | 0.3276855801  | 1.9570565000  | 0.0041536801  |
| C | 1.4360172200  | 0.0103705900  | 0.0454930201  |
| O | 3.5972258000  | -0.9900196401 | -0.0451374101 |
| H | 1.6317385100  | -2.5936615799 | 0.1912436300  |
| H | -0.1748826500 | -1.9994948700 | 0.2818334401  |

Frequencies:

2176i  
55  
76  
101  
142  
260  
340  
609  
728  
986  
1020  
1344  
1639  
1810  
2055  
2180  
3791  
3907

**C3-TS**

|   |               |               |              |
|---|---------------|---------------|--------------|
| O | 0.1309615300  | 1.2623146600  | 0.0000000000 |
| H | -3.7069287800 | -0.0118321000 | 0.0000000000 |
| O | -5.4264038300 | -0.6089752500 | 0.0000000000 |
| H | -6.4236440000 | 0.9092322200  | 0.0000000000 |
| C | 2.2410269700  | 0.5452323900  | 0.0000000000 |
| H | 3.9786324300  | 2.5628224400  | 0.0000000000 |
| O | 3.6937653400  | -1.3354902000 | 0.0000000000 |
| H | 4.8881918200  | 0.8740169300  | 0.0000000000 |

Frequencies:

2246i  
**15i**  
19  
**43**  
110  
192

330  
612  
725  
914  
1023  
1334  
1656  
1773  
2077  
2112  
3803  
3909

**Inter2**

|   |             |             |             |
|---|-------------|-------------|-------------|
| H | -4.33664548 | 1.02985078  | 1.62882979  |
| O | -3.74794989 | 0.73548250  | -0.07068364 |
| C | -1.18932402 | 0.31034084  | -0.08126743 |
| H | -0.05359014 | 2.02928752  | -0.30727653 |
| O | -0.27710565 | -1.76732267 | 0.01708055  |
| H | 3.45156368  | -0.77559061 | -0.00662672 |
| O | 4.58415200  | 0.65667267  | 0.05159065  |
| H | 6.22648265  | -0.02454245 | -0.31535026 |

Frequencies:

618i  
70  
76  
88  
164  
331  
466  
679  
926  
1108  
1215  
1405  
1652  
1785  
3067  
3750  
3826  
3898

**Inter1**

|   |             |             |             |
|---|-------------|-------------|-------------|
| H | -2.38591844 | 0.82301608  | 2.69325643  |
| O | -0.25332501 | 1.77768437  | -0.42454006 |
| H | 1.43644320  | 1.09393137  | -0.12925205 |
| O | -3.16852422 | -1.36073186 | -0.33268340 |

|   |             |             |             |
|---|-------------|-------------|-------------|
| C | -2.02078941 | 0.29416525  | 0.71594273  |
| H | 5.26083865  | -1.09789942 | 1.53213209  |
| O | 4.38902153  | -0.56263466 | 0.02963215  |
| H | 4.40010366  | -2.00954171 | -1.07334164 |

Frequencies:

379i  
58  
76  
168  
207  
225  
547  
689  
975  
1136  
1284  
1398  
1647  
1790  
3012  
3572  
3807  
3913

## Section 2: NBO output for Minima:

Results show the primary donor and acceptor interactions for each minima in kcal mol<sup>-1</sup>.

## SECOND ORDER PERTURBATION THEORY ANALYSIS OF FOCK MATRIX IN NBO BASIS

Threshold for printing: 0.50 kcal/mol  
 (Intermolecular threshold: 0.05 kcal/mol)

| Donor (L) NBO         | Acceptor (NL) NBO   | E(2)<br>kcal/mol | E(NL)-E(L)<br>a.u. | F(L,NL)<br>a.u. |
|-----------------------|---------------------|------------------|--------------------|-----------------|
| =====                 |                     |                  |                    |                 |
| within unit 1         |                     |                  |                    |                 |
| 5. LP (1) 0 2         | 18. BD*(1) H 1- C 5 | 1.67             | 0.92               | 0.035           |
| 5. LP (1) 0 2         | 22. BD*(2) O 4- C 5 | 8.13             | 1.14               | 0.086           |
| 5. LP (1) 0 2         | 77. RY (1) C 5      | 1.27             | 1.18               | 0.035           |
| 5. LP (1) 0 2         | 80. RY (4) C 5      | 0.82             | 2.06               | 0.037           |
| 6. LP (2) 0 2         | 21. BD*(1) O 4- C 5 | 56.09            | 0.32               | 0.120           |
| 6. LP (2) 0 2         | 79. RY (3) C 5      | 1.60             | 2.04               | 0.051           |
| 7. LP (1) 0 4         | 18. BD*(1) H 1- C 5 | 0.76             | 0.98               | 0.024           |
| 7. LP (1) 0 4         | 20. BD*(1) O 2- C 5 | 1.39             | 0.97               | 0.033           |
| 7. LP (1) 0 4         | 77. RY (1) C 5      | 5.72             | 1.24               | 0.075           |
| 7. LP (1) 0 4         | 78. RY (2) C 5      | 0.53             | 2.10               | 0.030           |
| 8. LP (2) 0 4         | 18. BD*(1) H 1- C 5 | 20.31            | 0.67               | 0.104           |
| 8. LP (2) 0 4         | 20. BD*(1) O 2- C 5 | 29.94            | 0.67               | 0.126           |
| 8. LP (2) 0 4         | 68. RY (10) O 4     | 0.53             | 1.91               | 0.029           |
| 8. LP (2) 0 4         | 78. RY (2) C 5      | 2.20             | 1.79               | 0.056           |
| 8. LP (2) 0 4         | 80. RY (4) C 5      | 0.53             | 1.82               | 0.028           |
| 11. BD (1) H 1- C 5   | 19. BD*(1) O 2- H 3 | 3.38             | 0.95               | 0.051           |
| 11. BD (1) H 1- C 5   | 59. RY (1) O 4      | 1.06             | 1.59               | 0.037           |
| 12. BD (1) O 2- H 3   | 18. BD*(1) H 1- C 5 | 3.49             | 1.10               | 0.055           |
| 12. BD (1) O 2- H 3   | 22. BD*(2) O 4- C 5 | 1.34             | 1.32               | 0.038           |
| 12. BD (1) O 2- H 3   | 77. RY (1) C 5      | 1.27             | 1.36               | 0.037           |
| 14. BD (1) O 4- C 5   | 21. BD*(1) O 4- C 5 | 1.04             | 0.38               | 0.018           |
| 14. BD (1) O 4- C 5   | 34. RY (2) O 2      | 0.67             | 1.14               | 0.025           |
| from unit 1 to unit 2 |                     |                  |                    |                 |
| 7. LP (1) 0 4         | 24. BD*(1) O 7- H 8 | 1.77             | 1.05               | 0.038           |
| 8. LP (2) 0 4         | 23. BD*(1) H 6- O 7 | 0.08             | 0.74               | 0.007           |
| 8. LP (2) 0 4         | 24. BD*(1) O 7- H 8 | 5.61             | 0.74               | 0.058           |
| 8. LP (2) 0 4         | 103. RY (1) O 7     | 0.06             | 1.55               | 0.009           |
| 12. BD (1) O 2- H 3   | 23. BD*(1) H 6- O 7 | 0.19             | 1.17               | 0.013           |
| 12. BD (1) O 2- H 3   | 103. RY (1) O 7     | 0.10             | 1.98               | 0.012           |
| 12. BD (1) O 2- H 3   | 104. RY (2) O 7     | 0.18             | 1.96               | 0.017           |
| from unit 2 to unit 1 |                     |                  |                    |                 |
| 9. LP (1) 0 7         | 19. BD*(1) O 2- H 3 | 0.39             | 0.87               | 0.016           |
| 10. LP (2) 0 7        | 19. BD*(1) O 2- H 3 | 18.50            | 0.84               | 0.111           |
| 10. LP (2) 0 7        | 35. RY (3) O 2      | 0.07             | 1.50               | 0.009           |
| 10. LP (2) 0 7        | 51. RY (1) H 3      | 0.19             | 1.56               | 0.015           |
| 10. LP (2) 0 7        | 52. RY (2) H 3      | 0.08             | 1.27               | 0.009           |
| 10. LP (2) 0 7        | 53. RY (3) H 3      | 0.06             | 1.17               | 0.007           |
| 10. LP (2) 0 7        | 56. RY (6) H 3      | 0.11             | 1.72               | 0.012           |
| 16. BD (1) H 6- O 7   | 52. RY (2) H 3      | 0.10             | 1.54               | 0.011           |
| 16. BD (1) H 6- O 7   | 53. RY (3) H 3      | 0.10             | 1.44               | 0.010           |
| 17. BD (1) O 7- H 8   | 19. BD*(1) O 2- H 3 | 1.14             | 1.12               | 0.032           |
| 17. BD (1) O 7- H 8   | 51. RY (1) H 3      | 0.11             | 1.83               | 0.013           |
| 17. BD (1) O 7- H 8   | 52. RY (2) H 3      | 0.15             | 1.55               | 0.014           |
| 17. BD (1) O 7- H 8   | 53. RY (3) H 3      | 0.09             | 1.45               | 0.010           |
| 17. BD (1) O 7- H 8   | 59. RY (1) O 4      | 0.14             | 1.76               | 0.014           |
| 17. BD (1) O 7- H 8   | 62. RY (4) O 4      | 0.12             | 1.92               | 0.014           |
| within unit 2         |                     |                  |                    |                 |
| 9. LP (1) 0 7         | 95. RY (1) H 6      | 0.70             | 1.55               | 0.029           |
| 9. LP (1) 0 7         | 122. RY (2) H 8     | 0.62             | 1.48               | 0.027           |
| 10. LP (2) 0 7        | 95. RY (1) H 6      | 0.70             | 1.52               | 0.029           |
| 10. LP (2) 0 7        | 124. RY (4) H 8     | 0.63             | 1.66               | 0.029           |

## SECOND ORDER PERTURBATION THEORY ANALYSIS OF FOCK MATRIX IN NBO BASIS

Threshold for printing: 0.50 kcal/mol  
 (Intermolecular threshold: 0.05 kcal/mol)

| Donor (L) NBO         | Acceptor (NL) NBO    | E(2)<br>kcal/mol | E(NL)-E(L)<br>a.u. | F(L,NL)<br>a.u. |
|-----------------------|----------------------|------------------|--------------------|-----------------|
| =====                 |                      |                  |                    |                 |
| within unit 1         |                      |                  |                    |                 |
| 5. LP ( 1) 0 2        | 18. BD*( 1) H 1- C 5 | 1.21             | 0.96               | 0.030           |
| 5. LP ( 1) 0 2        | 22. BD*( 2) O 4- C 5 | 6.91             | 1.18               | 0.080           |
| 5. LP ( 1) 0 2        | 77. RY ( 1) C 5      | 1.08             | 1.26               | 0.033           |
| 5. LP ( 1) 0 2        | 80. RY ( 4) C 5      | 0.85             | 1.98               | 0.037           |
| 6. LP ( 2) 0 2        | 21. BD*( 1) O 4- C 5 | 50.08            | 0.34               | 0.116           |
| 6. LP ( 2) 0 2        | 52. RY ( 2) H 3      | 1.20             | 1.50               | 0.038           |
| 6. LP ( 2) 0 2        | 79. RY ( 3) C 5      | 1.60             | 2.06               | 0.051           |
| 6. LP ( 2) 0 2        | 89. RY (13) C 5      | 0.59             | 0.98               | 0.021           |
| 7. LP ( 1) 0 4        | 18. BD*( 1) H 1- C 5 | 1.60             | 0.99               | 0.035           |
| 7. LP ( 1) 0 4        | 77. RY ( 1) C 5      | 5.05             | 1.29               | 0.072           |
| 7. LP ( 1) 0 4        | 78. RY ( 2) C 5      | 0.98             | 2.04               | 0.040           |
| 8. LP ( 2) 0 4        | 18. BD*( 1) H 1- C 5 | 19.09            | 0.68               | 0.102           |
| 8. LP ( 2) 0 4        | 20. BD*( 1) O 2- C 5 | 33.01            | 0.65               | 0.131           |
| 8. LP ( 2) 0 4        | 66. RY ( 8) O 4      | 0.77             | 1.65               | 0.032           |
| 8. LP ( 2) 0 4        | 78. RY ( 2) C 5      | 1.85             | 1.73               | 0.051           |
| 8. LP ( 2) 0 4        | 80. RY ( 4) C 5      | 0.99             | 1.71               | 0.037           |
| 11. BD ( 1) H 1- C 5  | 19. BD*( 1) O 2- H 3 | 3.72             | 0.94               | 0.053           |
| 11. BD ( 1) H 1- C 5  | 59. RY ( 1) O 4      | 1.33             | 1.40               | 0.039           |
| 12. BD ( 1) O 2- H 3  | 18. BD*( 1) H 1- C 5 | 3.50             | 1.11               | 0.056           |
| 12. BD ( 1) O 2- H 3  | 22. BD*( 2) O 4- C 5 | 1.69             | 1.33               | 0.042           |
| 12. BD ( 1) O 2- H 3  | 77. RY ( 1) C 5      | 1.13             | 1.41               | 0.036           |
| 14. BD ( 1) O 4- C 5  | 21. BD*( 1) O 4- C 5 | 0.89             | 0.39               | 0.017           |
| 14. BD ( 1) O 4- C 5  | 34. RY ( 2) O 2      | 0.68             | 1.17               | 0.025           |
| from unit 1 to unit 2 |                      |                  |                    |                 |
| 7. LP ( 1) 0 4        | 23. BD*( 1) O 6- H 7 | 1.09             | 1.09               | 0.031           |
| 8. LP ( 2) 0 4        | 23. BD*( 1) O 6- H 7 | 5.35             | 0.79               | 0.058           |
| 8. LP ( 2) 0 4        | 114. RY ( 2) H 7     | 0.10             | 1.35               | 0.010           |
| 11. BD ( 1) H 1- C 5  | 24. BD*( 1) O 6- H 8 | 0.13             | 1.04               | 0.010           |
| from unit 2 to unit 1 |                      |                  |                    |                 |
| 9. LP ( 1) 0 6        | 18. BD*( 1) H 1- C 5 | 0.50             | 0.92               | 0.019           |
| 9. LP ( 1) 0 6        | 20. BD*( 1) O 2- C 5 | 0.09             | 0.89               | 0.008           |
| 9. LP ( 1) 0 6        | 77. RY ( 1) C 5      | 0.06             | 1.22               | 0.007           |
| 16. BD ( 1) O 6- H 7  | 18. BD*( 1) H 1- C 5 | 0.11             | 1.07               | 0.010           |
| 16. BD ( 1) O 6- H 7  | 20. BD*( 1) O 2- C 5 | 0.16             | 1.03               | 0.011           |
| 16. BD ( 1) O 6- H 7  | 22. BD*( 2) O 4- C 5 | 0.06             | 1.29               | 0.008           |
| 16. BD ( 1) O 6- H 7  | 26. RY ( 2) H 1      | 0.10             | 1.18               | 0.010           |
| 16. BD ( 1) O 6- H 7  | 62. RY ( 4) O 4      | 0.09             | 1.74               | 0.011           |
| 16. BD ( 1) O 6- H 7  | 82. RY ( 6) C 5      | 0.06             | 1.91               | 0.010           |
| 17. BD ( 1) O 6- H 8  | 20. BD*( 1) O 2- C 5 | 0.08             | 1.03               | 0.008           |
| 17. BD ( 1) O 6- H 8  | 22. BD*( 2) O 4- C 5 | 0.06             | 1.28               | 0.008           |
| 17. BD ( 1) O 6- H 8  | 25. RY ( 1) H 1      | 0.35             | 1.16               | 0.018           |
| 17. BD ( 1) O 6- H 8  | 26. RY ( 2) H 1      | 0.33             | 1.17               | 0.018           |
| within unit 2         |                      |                  |                    |                 |
| 9. LP ( 1) 0 6        | 122. RY ( 2) H 8     | 0.74             | 1.77               | 0.032           |
| 10. LP ( 2) 0 6       | 113. RY ( 1) H 7     | 1.30             | 1.46               | 0.039           |
| 10. LP ( 2) 0 6       | 121. RY ( 1) H 8     | 1.68             | 1.37               | 0.043           |
| 17. BD ( 1) O 6- H 8  | 115. RY ( 3) H 7     | 0.75             | 1.83               | 0.033           |



## SECOND ORDER PERTURBATION THEORY ANALYSIS OF FOCK MATRIX IN NBO BASIS

Threshold for printing: 0.50 kcal/mol  
 (Intermolecular threshold: 0.05 kcal/mol)

| Donor (L) NBO         | Acceptor (NL) NBO    | E(2)<br>kcal/mol | E(NL)-E(L)<br>a.u. | F(L,NL)<br>a.u. |
|-----------------------|----------------------|------------------|--------------------|-----------------|
| =====                 |                      |                  |                    |                 |
| within unit 1         |                      |                  |                    |                 |
| 5. LP ( 1) O 2        | 18. BD*( 1) H 1- C 5 | 1.09             | 0.97               | 0.029           |
| 5. LP ( 1) O 2        | 22. BD*( 2) O 4- C 5 | 6.04             | 1.21               | 0.076           |
| 5. LP ( 1) O 2        | 77. RY ( 1) C 5      | 0.95             | 1.23               | 0.030           |
| 5. LP ( 1) O 2        | 80. RY ( 4) C 5      | 0.82             | 2.07               | 0.037           |
| 6. LP ( 2) O 2        | 21. BD*( 1) O 4- C 5 | 44.13            | 0.35               | 0.111           |
| 6. LP ( 2) O 2        | 52. RY ( 2) H 3      | 1.20             | 1.54               | 0.038           |
| 6. LP ( 2) O 2        | 79. RY ( 3) C 5      | 1.46             | 2.05               | 0.049           |
| 6. LP ( 2) O 2        | 83. RY ( 7) C 5      | 0.68             | 1.11               | 0.025           |
| 7. LP ( 1) O 4        | 18. BD*( 1) H 1- C 5 | 1.37             | 0.98               | 0.033           |
| 7. LP ( 1) O 4        | 20. BD*( 1) O 2- C 5 | 0.78             | 0.92               | 0.024           |
| 7. LP ( 1) O 4        | 77. RY ( 1) C 5      | 6.25             | 1.24               | 0.078           |
| 7. LP ( 1) O 4        | 78. RY ( 2) C 5      | 0.58             | 2.10               | 0.031           |
| 8. LP ( 2) O 4        | 18. BD*( 1) H 1- C 5 | 19.91            | 0.68               | 0.104           |
| 8. LP ( 2) O 4        | 20. BD*( 1) O 2- C 5 | 36.41            | 0.62               | 0.134           |
| 8. LP ( 2) O 4        | 67. RY ( 9) O 4      | 0.57             | 1.48               | 0.026           |
| 8. LP ( 2) O 4        | 78. RY ( 2) C 5      | 2.30             | 1.79               | 0.057           |
| 8. LP ( 2) O 4        | 80. RY ( 4) C 5      | 0.96             | 1.77               | 0.037           |
| 11. BD ( 1) H 1- C 5  | 19. BD*( 1) O 2- H 3 | 3.46             | 0.94               | 0.051           |
| 11. BD ( 1) H 1- C 5  | 59. RY ( 1) O 4      | 1.43             | 1.34               | 0.039           |
| 12. BD ( 1) O 2- H 3  | 18. BD*( 1) H 1- C 5 | 3.13             | 1.12               | 0.053           |
| 12. BD ( 1) O 2- H 3  | 22. BD*( 2) O 4- C 5 | 1.58             | 1.36               | 0.041           |
| 12. BD ( 1) O 2- H 3  | 77. RY ( 1) C 5      | 0.99             | 1.38               | 0.033           |
| 14. BD ( 1) O 4- C 5  | 21. BD*( 1) O 4- C 5 | 0.75             | 0.39               | 0.015           |
| 14. BD ( 1) O 4- C 5  | 34. RY ( 2) O 2      | 0.64             | 1.17               | 0.024           |
| from unit 1 to unit 2 |                      |                  |                    |                 |
| 5. LP ( 1) O 2        | 23. BD*( 1) H 6- O 7 | 1.73             | 1.05               | 0.038           |
| 5. LP ( 1) O 2        | 24. BD*( 1) O 7- H 8 | 0.06             | 1.05               | 0.007           |
| 11. BD ( 1) H 1- C 5  | 24. BD*( 1) O 7- H 8 | 0.14             | 1.03               | 0.011           |
| 12. BD ( 1) O 2- H 3  | 23. BD*( 1) H 6- O 7 | 0.06             | 1.21               | 0.008           |
| 12. BD ( 1) O 2- H 3  | 97. RY ( 3) H 6      | 0.08             | 1.59               | 0.010           |
| from unit 2 to unit 1 |                      |                  |                    |                 |
| 10. LP ( 2) O 7       | 18. BD*( 1) H 1- C 5 | 1.20             | 0.95               | 0.030           |
| 10. LP ( 2) O 7       | 22. BD*( 2) O 4- C 5 | 0.09             | 1.19               | 0.009           |
| 10. LP ( 2) O 7       | 77. RY ( 1) C 5      | 0.05             | 1.21               | 0.007           |
| 16. BD ( 1) H 6- O 7  | 18. BD*( 1) H 1- C 5 | 0.18             | 1.09               | 0.012           |
| 16. BD ( 1) H 6- O 7  | 19. BD*( 1) O 2- H 3 | 0.19             | 1.09               | 0.013           |
| 16. BD ( 1) H 6- O 7  | 25. RY ( 1) H 1      | 0.12             | 1.30               | 0.011           |
| 16. BD ( 1) H 6- O 7  | 35. RY ( 3) O 2      | 0.11             | 1.30               | 0.011           |
| 17. BD ( 1) O 7- H 8  | 22. BD*( 2) O 4- C 5 | 0.06             | 1.32               | 0.008           |
| 17. BD ( 1) O 7- H 8  | 25. RY ( 1) H 1      | 0.76             | 1.29               | 0.028           |
| 17. BD ( 1) O 7- H 8  | 77. RY ( 1) C 5      | 0.05             | 1.34               | 0.008           |
| within unit 2         |                      |                  |                    |                 |
| 9. LP ( 1) O 7        | 95. RY ( 1) H 6      | 1.48             | 1.43               | 0.041           |
| 9. LP ( 1) O 7        | 121. RY ( 1) H 8     | 1.69             | 1.38               | 0.043           |
| 10. LP ( 2) O 7       | 122. RY ( 2) H 8     | 0.79             | 1.67               | 0.032           |
| 17. BD ( 1) O 7- H 8  | 96. RY ( 2) H 6      | 0.51             | 1.76               | 0.027           |

C1

**SECOND ORDER PERTURBATION THEORY ANALYSIS OF FOCK MATRIX IN NBO BASIS**

Threshold for printing: 0.50 kcal/mol  
(Intermolecular threshold: 0.05 kcal/mol)

| Donor (L) NBO         | Acceptor (NL) NBO   | E(2)<br>kcal/mol | E(NL)-E(L)<br>a.u. | F(L,NL)<br>a.u. |
|-----------------------|---------------------|------------------|--------------------|-----------------|
| =====                 |                     |                  |                    |                 |
| within unit 1         |                     |                  |                    |                 |
| 5. LP (1) 0 2         | 18. BD*(1) H 1- C 5 | 4.65             | 0.91               | 0.058           |
| 5. LP (1) 0 2         | 22. BD*(2) O 4- C 5 | 2.31             | 1.18               | 0.047           |
| 5. LP (1) 0 2         | 78. RY (2) C 5      | 0.70             | 2.03               | 0.034           |
| 5. LP (1) 0 2         | 81. RY (5) C 5      | 0.68             | 2.13               | 0.034           |
| 6. LP (2) 0 2         | 21. BD*(1) O 4- C 5 | 49.41            | 0.34               | 0.115           |
| 6. LP (2) 0 2         | 51. RY (1) H 3      | 0.96             | 1.03               | 0.028           |
| 6. LP (2) 0 2         | 56. RY (6) H 3      | 0.57             | 2.09               | 0.031           |
| 6. LP (2) 0 2         | 79. RY (3) C 5      | 1.43             | 2.01               | 0.048           |
| 6. LP (2) 0 2         | 93. RY (17) C 5     | 0.88             | 0.90               | 0.025           |
| 7. LP (1) 0 4         | 18. BD*(1) H 1- C 5 | 1.35             | 0.94               | 0.032           |
| 7. LP (1) 0 4         | 20. BD*(1) O 2- C 5 | 0.69             | 0.94               | 0.023           |
| 7. LP (1) 0 4         | 77. RY (1) C 5      | 6.89             | 1.26               | 0.083           |
| 8. LP (2) 0 4         | 18. BD*(1) H 1- C 5 | 21.52            | 0.64               | 0.105           |
| 8. LP (2) 0 4         | 20. BD*(1) O 2- C 5 | 34.61            | 0.64               | 0.132           |
| 8. LP (2) 0 4         | 65. RY (7) O 4      | 0.95             | 1.73               | 0.036           |
| 8. LP (2) 0 4         | 78. RY (2) C 5      | 2.08             | 1.76               | 0.054           |
| 8. LP (2) 0 4         | 81. RY (5) C 5      | 0.52             | 1.86               | 0.028           |
| 8. LP (2) 0 4         | 82. RY (6) C 5      | 0.51             | 1.70               | 0.026           |
| 11. BD (1) H 1- C 5   | 20. BD*(1) O 2- C 5 | 0.51             | 0.92               | 0.019           |
| 11. BD (1) H 1- C 5   | 33. RY (1) O 2      | 0.50             | 1.12               | 0.021           |
| 11. BD (1) H 1- C 5   | 59. RY (1) O 4      | 1.47             | 1.30               | 0.039           |
| 12. BD (1) O 2- H 3   | 18. BD*(1) H 1- C 5 | 0.62             | 1.09               | 0.023           |
| 12. BD (1) O 2- H 3   | 22. BD*(2) O 4- C 5 | 5.27             | 1.36               | 0.076           |
| 12. BD (1) O 2- H 3   | 80. RY (4) C 5      | 1.56             | 1.76               | 0.047           |
| 13. BD (1) O 2- C 5   | 18. BD*(1) H 1- C 5 | 0.53             | 1.20               | 0.023           |
| 13. BD (1) O 2- C 5   | 59. RY (1) O 4      | 0.61             | 1.58               | 0.028           |
| 14. BD (1) O 4- C 5   | 21. BD*(1) O 4- C 5 | 0.89             | 0.39               | 0.017           |
| 14. BD (1) O 4- C 5   | 34. RY (2) O 2      | 0.67             | 1.39               | 0.027           |
| 15. BD (2) O 4- C 5   | 19. BD*(1) O 2- H 3 | 0.94             | 1.35               | 0.032           |
| 15. BD (2) O 4- C 5   | 33. RY (1) O 2      | 0.59             | 1.50               | 0.027           |
| from unit 1 to unit 2 |                     |                  |                    |                 |
| 12. BD (1) O 2- H 3   | 23. BD*(1) O 6- H 7 | 0.06             | 1.14               | 0.008           |
| 12. BD (1) O 2- H 3   | 24. BD*(1) O 6- H 8 | 0.06             | 1.14               | 0.008           |
| 12. BD (1) O 2- H 3   | 96. RY (2) O 6      | 0.26             | 2.07               | 0.021           |
| from unit 2 to unit 1 |                     |                  |                    |                 |
| 9. LP (1) 0 6         | 18. BD*(1) H 1- C 5 | 0.08             | 0.83               | 0.007           |
| 9. LP (1) 0 6         | 19. BD*(1) O 2- H 3 | 0.22             | 0.88               | 0.012           |
| 10. LP (2) 0 6        | 19. BD*(1) O 2- H 3 | 16.44            | 0.96               | 0.112           |
| 10. LP (2) 0 6        | 33. RY (1) O 2      | 0.14             | 1.11               | 0.011           |
| 10. LP (2) 0 6        | 53. RY (3) H 3      | 0.18             | 1.11               | 0.013           |
| 10. LP (2) 0 6        | 55. RY (5) H 3      | 0.14             | 1.99               | 0.015           |
| 10. LP (2) 0 6        | 57. RY (7) H 3      | 0.31             | 2.13               | 0.023           |
| 16. BD (1) O 6- H 7   | 19. BD*(1) O 2- H 3 | 0.07             | 1.17               | 0.008           |
| 16. BD (1) O 6- H 7   | 51. RY (1) H 3      | 0.15             | 1.44               | 0.013           |
| 16. BD (1) O 6- H 7   | 54. RY (4) H 3      | 0.06             | 1.73               | 0.009           |
| 17. BD (1) O 6- H 8   | 19. BD*(1) O 2- H 3 | 0.07             | 1.17               | 0.008           |
| 17. BD (1) O 6- H 8   | 51. RY (1) H 3      | 0.15             | 1.44               | 0.013           |
| 17. BD (1) O 6- H 8   | 54. RY (4) H 3      | 0.06             | 1.73               | 0.009           |
| within unit 2         |                     |                  |                    |                 |
| 9. LP (1) 0 6         | 113. RY (1) H 7     | 1.17             | 1.56               | 0.038           |
| 9. LP (1) 0 6         | 121. RY (1) H 8     | 1.17             | 1.56               | 0.038           |
| 10. LP (2) 0 6        | 114. RY (2) H 7     | 0.61             | 1.64               | 0.028           |
| 10. LP (2) 0 6        | 122. RY (2) H 8     | 0.61             | 1.64               | 0.028           |

**SECOND ORDER PERTURBATION THEORY ANALYSIS OF FOCK MATRIX IN NBO BASIS**

Threshold for printing: 0.50 kcal/mol  
(Intermolecular threshold: 0.05 kcal/mol)

| Donor (L) NBO         | Acceptor (NL) NBO    | E(2)<br>kcal/mol | E(NL)-E(L)<br>a.u. | F(L,NL)<br>a.u. |
|-----------------------|----------------------|------------------|--------------------|-----------------|
| =====                 |                      |                  |                    |                 |
| within unit 1         |                      |                  |                    |                 |
| 5. LP ( 1) 0 2        | 18. BD*( 1) H 1- C 5 | 4.07             | 0.94               | 0.055           |
| 5. LP ( 1) 0 2        | 22. BD*( 2) O 4- C 5 | 2.05             | 1.19               | 0.044           |
| 5. LP ( 1) 0 2        | 78. RY ( 2) C 5      | 0.86             | 1.90               | 0.036           |
| 5. LP ( 1) 0 2        | 81. RY ( 5) C 5      | 0.56             | 2.30               | 0.032           |
| 6. LP ( 2) 0 2        | 21. BD*( 1) O 4- C 5 | 47.63            | 0.34               | 0.114           |
| 6. LP ( 2) 0 2        | 51. RY ( 1) H 3      | 1.50             | 1.15               | 0.037           |
| 6. LP ( 2) 0 2        | 79. RY ( 3) C 5      | 1.52             | 2.02               | 0.049           |
| 6. LP ( 2) 0 2        | 90. RY (14) C 5      | 0.53             | 1.01               | 0.021           |
| 7. LP ( 1) 0 4        | 18. BD*( 1) H 1- C 5 | 1.72             | 0.96               | 0.036           |
| 7. LP ( 1) 0 4        | 77. RY ( 1) C 5      | 5.32             | 1.34               | 0.075           |
| 7. LP ( 1) 0 4        | 78. RY ( 2) C 5      | 0.84             | 1.91               | 0.036           |
| 8. LP ( 2) 0 4        | 18. BD*( 1) H 1- C 5 | 19.55            | 0.66               | 0.102           |
| 8. LP ( 2) 0 4        | 20. BD*( 1) O 2- C 5 | 34.30            | 0.64               | 0.132           |
| 8. LP ( 2) 0 4        | 77. RY ( 1) C 5      | 0.68             | 1.04               | 0.024           |
| 8. LP ( 2) 0 4        | 78. RY ( 2) C 5      | 1.66             | 1.61               | 0.046           |
| 8. LP ( 2) 0 4        | 80. RY ( 4) C 5      | 0.99             | 1.33               | 0.032           |
| 11. BD ( 1) H 1- C 5  | 20. BD*( 1) O 2- C 5 | 0.50             | 0.91               | 0.019           |
| 11. BD ( 1) H 1- C 5  | 59. RY ( 1) O 4      | 1.45             | 1.39               | 0.040           |
| 12. BD ( 1) O 2- H 3  | 18. BD*( 1) H 1- C 5 | 0.60             | 1.10               | 0.023           |
| 12. BD ( 1) O 2- H 3  | 22. BD*( 2) O 4- C 5 | 5.49             | 1.35               | 0.077           |
| 12. BD ( 1) O 2- H 3  | 80. RY ( 4) C 5      | 1.35             | 1.77               | 0.044           |
| 13. BD ( 1) O 2- C 5  | 18. BD*( 1) H 1- C 5 | 0.50             | 1.23               | 0.022           |
| 13. BD ( 1) O 2- C 5  | 59. RY ( 1) O 4      | 0.54             | 1.68               | 0.027           |
| 14. BD ( 1) O 4- C 5  | 21. BD*( 1) O 4- C 5 | 0.84             | 0.39               | 0.016           |
| 14. BD ( 1) O 4- C 5  | 34. RY ( 2) O 2      | 0.69             | 1.38               | 0.027           |
| 15. BD ( 2) O 4- C 5  | 19. BD*( 1) O 2- H 3 | 0.90             | 1.33               | 0.031           |
| 15. BD ( 2) O 4- C 5  | 33. RY ( 1) O 2      | 0.59             | 1.67               | 0.028           |
| from unit 1 to unit 2 |                      |                  |                    |                 |
| 7. LP ( 1) 0 4        | 24. BD*( 1) O 6- H 8 | 1.06             | 1.08               | 0.030           |
| 8. LP ( 2) 0 4        | 23. BD*( 1) O 6- H 7 | 0.05             | 0.78               | 0.006           |
| 8. LP ( 2) 0 4        | 24. BD*( 1) O 6- H 8 | 5.62             | 0.78               | 0.059           |
| 8. LP ( 2) 0 4        | 97. RY ( 3) O 6      | 0.06             | 1.61               | 0.009           |
| 11. BD ( 1) H 1- C 5  | 23. BD*( 1) O 6- H 7 | 0.14             | 1.05               | 0.011           |
| from unit 2 to unit 1 |                      |                  |                    |                 |
| 10. LP ( 2) 0 6       | 18. BD*( 1) H 1- C 5 | 0.65             | 0.91               | 0.022           |
| 10. LP ( 2) 0 6       | 20. BD*( 1) O 2- C 5 | 0.10             | 0.88               | 0.009           |
| 16. BD ( 1) O 6- H 7  | 20. BD*( 1) O 2- C 5 | 0.08             | 1.02               | 0.008           |
| 16. BD ( 1) O 6- H 7  | 22. BD*( 2) O 4- C 5 | 0.06             | 1.30               | 0.008           |
| 16. BD ( 1) O 6- H 7  | 25. RY ( 1) H 1      | 0.41             | 1.13               | 0.019           |
| 16. BD ( 1) O 6- H 7  | 26. RY ( 2) H 1      | 0.27             | 1.21               | 0.016           |
| 16. BD ( 1) O 6- H 7  | 80. RY ( 4) C 5      | 0.05             | 1.72               | 0.009           |
| 17. BD ( 1) O 6- H 8  | 18. BD*( 1) H 1- C 5 | 0.14             | 1.05               | 0.011           |
| 17. BD ( 1) O 6- H 8  | 20. BD*( 1) O 2- C 5 | 0.18             | 1.03               | 0.012           |
| 17. BD ( 1) O 6- H 8  | 22. BD*( 2) O 4- C 5 | 0.07             | 1.30               | 0.009           |
| 17. BD ( 1) O 6- H 8  | 26. RY ( 2) H 1      | 0.07             | 1.22               | 0.008           |
| 17. BD ( 1) O 6- H 8  | 59. RY ( 1) O 4      | 0.06             | 1.51               | 0.009           |
| 17. BD ( 1) O 6- H 8  | 61. RY ( 3) O 4      | 0.06             | 1.75               | 0.009           |
| 17. BD ( 1) O 6- H 8  | 80. RY ( 4) C 5      | 0.07             | 1.72               | 0.010           |
| within unit 2         |                      |                  |                    |                 |
| 9. LP ( 1) 0 6        | 113. RY ( 1) H 7     | 1.67             | 1.37               | 0.043           |
| 9. LP ( 1) 0 6        | 121. RY ( 1) H 8     | 1.28             | 1.46               | 0.039           |
| 10. LP ( 2) 0 6       | 114. RY ( 2) H 7     | 0.72             | 1.79               | 0.032           |
| 16. BD ( 1) O 6- H 7  | 123. RY ( 3) H 8     | 0.73             | 1.86               | 0.033           |

## SECOND ORDER PERTURBATION THEORY ANALYSIS OF FOCK MATRIX IN NBO BASIS

Threshold for printing: 0.50 kcal/mol  
 (Intermolecular threshold: 0.05 kcal/mol)

| Donor (L) NBO         | Acceptor (NL) NBO    | E(2)<br>kcal/mol | E(NL)-E(L)<br>a.u. | F(L,NL)<br>a.u. |
|-----------------------|----------------------|------------------|--------------------|-----------------|
| =====                 |                      |                  |                    |                 |
| within unit 1         |                      |                  |                    |                 |
| 5. LP ( 1) O 2        | 26. RY ( 2) H 1      | 0.84             | 1.72               | 0.034           |
| 5. LP ( 1) O 2        | 54. RY ( 4) H 3      | 0.55             | 1.91               | 0.029           |
| 6. LP ( 2) O 2        | 25. RY ( 1) H 1      | 1.82             | 1.36               | 0.044           |
| 6. LP ( 2) O 2        | 52. RY ( 2) H 3      | 1.35             | 1.55               | 0.041           |
| 11. BD ( 1) H 1- O 2  | 53. RY ( 3) H 3      | 0.88             | 1.85               | 0.036           |
| from unit 1 to unit 2 |                      |                  |                    |                 |
| 5. LP ( 1) O 2        | 21. BD*( 2) O 4- C 5 | 0.09             | 1.13               | 0.009           |
| 12. BD ( 1) O 2- H 3  | 59. RY ( 1) O 4      | 0.13             | 1.67               | 0.013           |
| 12. BD ( 1) O 2- H 3  | 62. RY ( 4) O 4      | 0.07             | 2.10               | 0.011           |
| from unit 2 to unit 1 |                      |                  |                    |                 |
| 7. LP ( 1) O 4        | 19. BD*( 1) O 2- H 3 | 2.53             | 1.12               | 0.048           |
| 8. LP ( 2) O 4        | 19. BD*( 1) O 2- H 3 | 4.08             | 0.82               | 0.052           |
| 16. BD ( 1) C 5- H 8  | 19. BD*( 1) O 2- H 3 | 0.07             | 1.10               | 0.008           |
| 16. BD ( 1) C 5- H 8  | 51. RY ( 1) H 3      | 0.07             | 1.53               | 0.009           |
| within unit 2         |                      |                  |                    |                 |
| 7. LP ( 1) O 4        | 22. BD*( 1) C 5- O 6 | 0.91             | 0.94               | 0.026           |
| 7. LP ( 1) O 4        | 23. BD*( 1) C 5- H 8 | 0.96             | 0.95               | 0.027           |
| 7. LP ( 1) O 4        | 77. RY ( 1) C 5      | 6.89             | 1.25               | 0.083           |
| 8. LP ( 2) O 4        | 22. BD*( 1) C 5- O 6 | 34.02            | 0.63               | 0.131           |
| 8. LP ( 2) O 4        | 23. BD*( 1) C 5- H 8 | 21.32            | 0.65               | 0.105           |
| 8. LP ( 2) O 4        | 64. RY ( 6) O 4      | 0.82             | 1.41               | 0.030           |
| 8. LP ( 2) O 4        | 78. RY ( 2) C 5      | 2.23             | 1.73               | 0.055           |
| 8. LP ( 2) O 4        | 80. RY ( 4) C 5      | 0.64             | 1.37               | 0.027           |
| 9. LP ( 1) O 6        | 21. BD*( 2) O 4- C 5 | 2.12             | 1.19               | 0.045           |
| 9. LP ( 1) O 6        | 23. BD*( 1) C 5- H 8 | 4.21             | 0.93               | 0.056           |
| 9. LP ( 1) O 6        | 78. RY ( 2) C 5      | 0.70             | 2.01               | 0.034           |
| 9. LP ( 1) O 6        | 81. RY ( 5) C 5      | 0.63             | 2.18               | 0.033           |
| 10. LP ( 2) O 6       | 20. BD*( 1) O 4- C 5 | 48.32            | 0.34               | 0.114           |
| 10. LP ( 2) O 6       | 79. RY ( 3) C 5      | 1.53             | 2.02               | 0.050           |
| 10. LP ( 2) O 6       | 113. RY ( 1) H 7     | 1.49             | 1.18               | 0.037           |
| 13. BD ( 1) O 4- C 5  | 20. BD*( 1) O 4- C 5 | 0.86             | 0.39               | 0.016           |
| 13. BD ( 1) O 4- C 5  | 96. RY ( 2) O 6      | 0.67             | 1.35               | 0.027           |
| 14. BD ( 2) O 4- C 5  | 24. BD*( 1) O 6- H 7 | 0.90             | 1.34               | 0.031           |
| 14. BD ( 2) O 4- C 5  | 95. RY ( 1) O 6      | 0.58             | 1.68               | 0.028           |
| 15. BD ( 1) C 5- O 6  | 23. BD*( 1) C 5- H 8 | 0.52             | 1.21               | 0.022           |
| 15. BD ( 1) C 5- O 6  | 59. RY ( 1) O 4      | 0.63             | 1.87               | 0.031           |
| 16. BD ( 1) C 5- H 8  | 22. BD*( 1) C 5- O 6 | 0.58             | 0.91               | 0.020           |
| 16. BD ( 1) C 5- H 8  | 59. RY ( 1) O 4      | 1.23             | 1.58               | 0.039           |
| 17. BD ( 1) O 6- H 7  | 21. BD*( 2) O 4- C 5 | 5.39             | 1.36               | 0.076           |
| 17. BD ( 1) O 6- H 7  | 23. BD*( 1) C 5- H 8 | 0.64             | 1.09               | 0.024           |
| 17. BD ( 1) O 6- H 7  | 80. RY ( 4) C 5      | 1.49             | 1.82               | 0.046           |

**SECOND ORDER PERTURBATION THEORY ANALYSIS OF FOCK MATRIX IN NBO BASIS**

Threshold for printing: 0.50 kcal/mol  
(Intermolecular threshold: 0.05 kcal/mol)

| Donor (L) NBO         | Acceptor (NL) NBO    | E(2)<br>kcal/mol | E(NL)-E(L)<br>a.u. | F(L,NL)<br>a.u. |
|-----------------------|----------------------|------------------|--------------------|-----------------|
| =====                 |                      |                  |                    |                 |
| within unit 1         |                      |                  |                    |                 |
| 5. LP ( 1) 0 2        | 18. BD*( 1) H 1- C 5 | 4.10             | 0.93               | 0.055           |
| 5. LP ( 1) 0 2        | 22. BD*( 2) O 4- C 5 | 2.08             | 1.20               | 0.045           |
| 5. LP ( 1) 0 2        | 78. RY ( 2) C 5      | 0.71             | 2.01               | 0.034           |
| 5. LP ( 1) 0 2        | 81. RY ( 5) C 5      | 0.62             | 2.19               | 0.033           |
| 6. LP ( 2) 0 2        | 21. BD*( 1) O 4- C 5 | 46.60            | 0.34               | 0.113           |
| 6. LP ( 2) 0 2        | 51. RY ( 1) H 3      | 1.47             | 1.18               | 0.037           |
| 6. LP ( 2) 0 2        | 79. RY ( 3) C 5      | 1.50             | 2.02               | 0.049           |
| 6. LP ( 2) 0 2        | 91. RY (15) C 5      | 0.89             | 0.90               | 0.025           |
| 7. LP ( 1) 0 4        | 18. BD*( 1) H 1- C 5 | 1.03             | 0.95               | 0.028           |
| 7. LP ( 1) 0 4        | 20. BD*( 1) O 2- C 5 | 0.87             | 0.93               | 0.025           |
| 7. LP ( 1) 0 4        | 77. RY ( 1) C 5      | 7.05             | 1.25               | 0.084           |
| 8. LP ( 2) 0 4        | 18. BD*( 1) H 1- C 5 | 21.46            | 0.65               | 0.105           |
| 8. LP ( 2) 0 4        | 20. BD*( 1) O 2- C 5 | 34.87            | 0.63               | 0.132           |
| 8. LP ( 2) 0 4        | 66. RY ( 8) O 4      | 0.52             | 1.80               | 0.027           |
| 8. LP ( 2) 0 4        | 78. RY ( 2) C 5      | 2.27             | 1.72               | 0.056           |
| 8. LP ( 2) 0 4        | 80. RY ( 4) C 5      | 0.67             | 1.37               | 0.027           |
| 8. LP ( 2) 0 4        | 85. RY ( 9) C 5      | 0.62             | 1.38               | 0.026           |
| 11. BD ( 1) H 1- C 5  | 20. BD*( 1) O 2- C 5 | 0.59             | 0.91               | 0.021           |
| 11. BD ( 1) H 1- C 5  | 59. RY ( 1) O 4      | 1.20             | 1.59               | 0.039           |
| 12. BD ( 1) 0 2- H 3  | 18. BD*( 1) H 1- C 5 | 0.63             | 1.09               | 0.023           |
| 12. BD ( 1) 0 2- H 3  | 22. BD*( 2) O 4- C 5 | 5.24             | 1.36               | 0.075           |
| 12. BD ( 1) 0 2- H 3  | 80. RY ( 4) C 5      | 1.45             | 1.82               | 0.046           |
| 13. BD ( 1) 0 2- C 5  | 18. BD*( 1) H 1- C 5 | 0.54             | 1.21               | 0.023           |
| 13. BD ( 1) 0 2- C 5  | 59. RY ( 1) O 4      | 0.62             | 1.88               | 0.030           |
| 14. BD ( 1) 0 4- C 5  | 21. BD*( 1) O 4- C 5 | 0.82             | 0.39               | 0.016           |
| 14. BD ( 1) 0 4- C 5  | 34. RY ( 2) O 2      | 0.65             | 1.32               | 0.026           |
| 15. BD ( 2) 0 4- C 5  | 19. BD*( 1) O 2- H 3 | 0.89             | 1.34               | 0.031           |
| 15. BD ( 2) 0 4- C 5  | 33. RY ( 1) O 2      | 0.56             | 1.69               | 0.027           |
| from unit 1 to unit 2 |                      |                  |                    |                 |
| 7. LP ( 1) 0 4        | 23. BD*( 1) O 6- H 7 | 1.91             | 1.12               | 0.041           |
| 8. LP ( 2) 0 4        | 23. BD*( 1) O 6- H 7 | 3.98             | 0.82               | 0.051           |
| 11. BD ( 1) H 1- C 5  | 23. BD*( 1) O 6- H 7 | 0.06             | 1.10               | 0.007           |
| 11. BD ( 1) H 1- C 5  | 113. RY ( 1) H 7     | 0.07             | 1.47               | 0.009           |
| from unit 2 to unit 1 |                      |                  |                    |                 |
| 9. LP ( 1) 0 6        | 22. BD*( 2) O 4- C 5 | 0.05             | 1.13               | 0.007           |
| 16. BD ( 1) 0 6- H 7  | 59. RY ( 1) O 4      | 0.09             | 1.67               | 0.011           |
| 16. BD ( 1) 0 6- H 7  | 63. RY ( 5) O 4      | 0.06             | 2.00               | 0.010           |
| within unit 2         |                      |                  |                    |                 |
| 9. LP ( 1) 0 6        | 116. RY ( 4) H 7     | 0.58             | 1.85               | 0.029           |
| 9. LP ( 1) 0 6        | 122. RY ( 2) H 8     | 0.82             | 1.67               | 0.033           |
| 10. LP ( 2) 0 6       | 114. RY ( 2) H 7     | 1.37             | 1.53               | 0.041           |
| 10. LP ( 2) 0 6       | 121. RY ( 1) H 8     | 1.80             | 1.34               | 0.044           |
| 17. BD ( 1) 0 6- H 8  | 115. RY ( 3) H 7     | 1.12             | 1.78               | 0.040           |

Section 3  
Figure 1

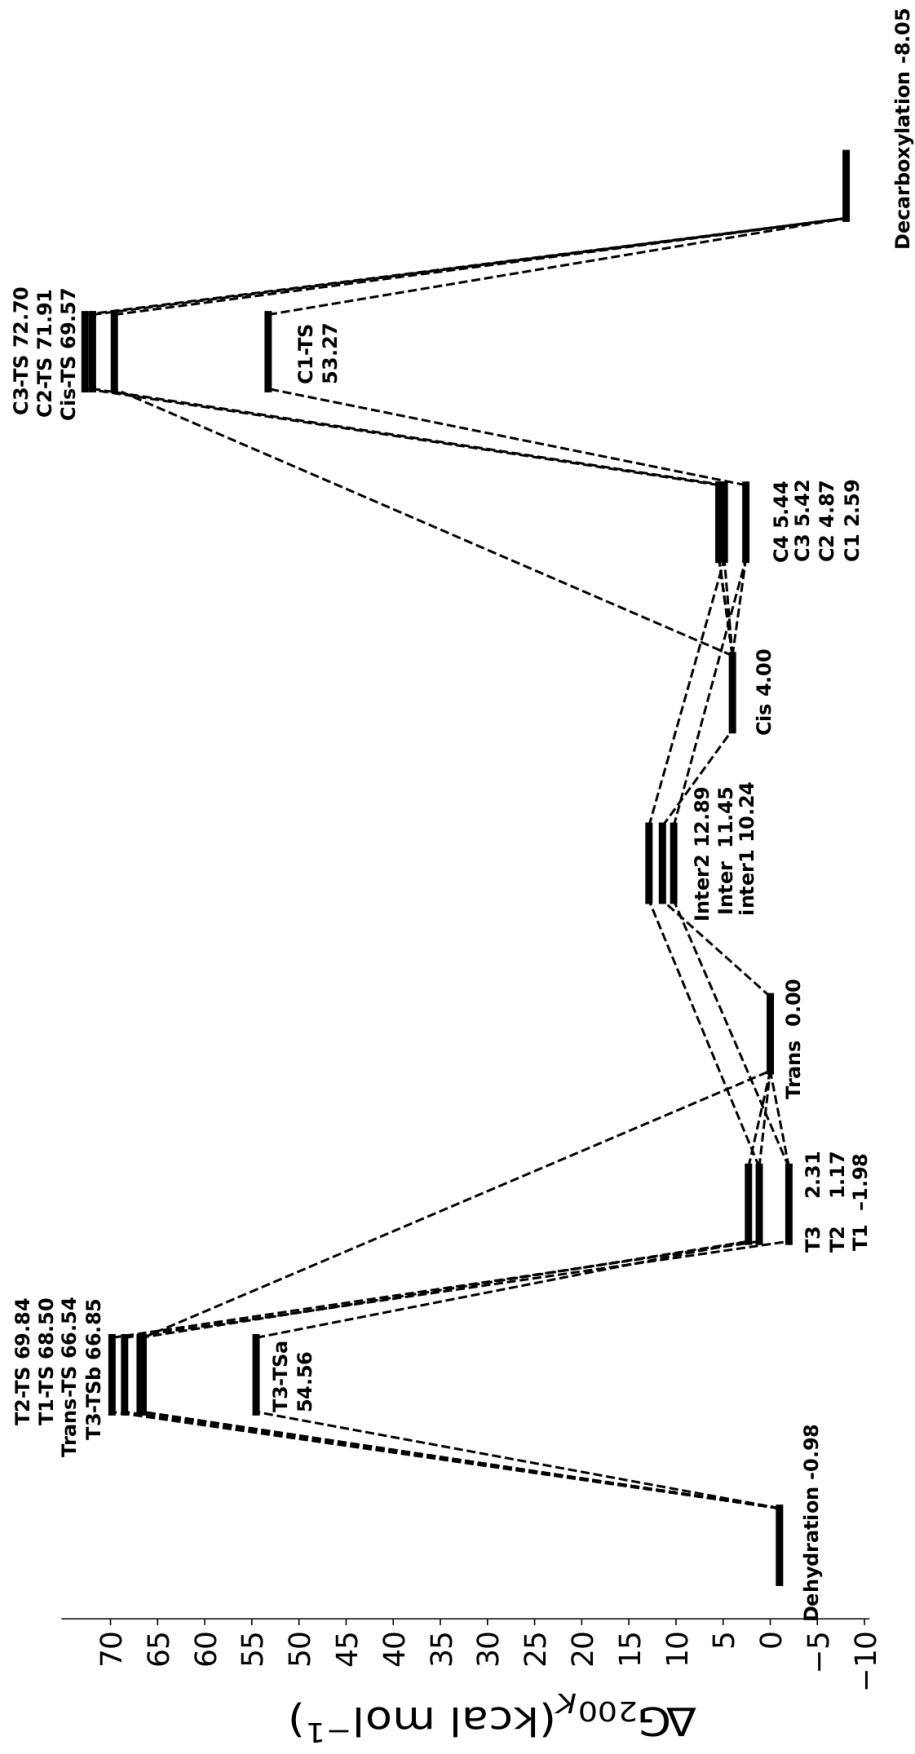

Supplement: d0cp03796f1.pdf [file d0cp03796f1.pdf]
